# Supplementary material
Source: Research Square preprint supplement (doi:10.21203/rs.3.rs-8904788/v1)
Supplement: Supplementary file 1 [file 2444bcf4745abb29332d46cc.docx]

**Holo-BLf inhibits metastasis to lungs induced by BPA in NSG mice inoculated with MDA-MB-231 cells**

|  | | | | |
| --- | --- | --- | --- | --- |
| **Total number of metastatic nodules**  **n=4/group** | | | | |
|  | **Basal** | **BPA** | **Holo-BLf** | **Holo-BLf + BPA** |
| **Lungs** | **16** | **39** | **15** | **24** |
| **Liver** | **0** | **0** | **0** | **0** |
| **Brain** | **0** | **0** | **0** | **0** |

|  | | | | |
| --- | --- | --- | --- | --- |
| **Average number of metastatic nodules number per mouse**  **n=4/group** | | | | |
|  | **Basal** | **BPA** | **Holo-BLf** | **Holo-BLf + BPA** |
| **Lung** | **4** | **9.75** | **3.75** | **6** |
| **Liver** | **0** | **0** | **0** | **0** |
| **Brain** | **0** | **0** | **0** | **0** |
