# Supplementary material
Source: Research Square preprint supplement (doi:10.21203/rs.3.rs-8904788/v1)
Supplement: Supplementary file 2 [file e7010048ce6f64b1d89d414c.docx]

**Role of Holo-BLf in the growth of mammary tumors induced by BPA in NSG mice inoculated with MDA-MB-231 cells**

|  | **Experimental groups (n=4)** | | |  |
| --- | --- | --- | --- | --- |
|  | **Basal** | **BPA** | **Holo-BLf** | **Holo-BLf + BPA** |
| **Tumor weight (mg)** | **90.5 ± 18.55** | **205 ± 66.28** | **96.5 ± 55.84** | **94.75 ± 42.75** |
| **Tumor volume (cm3)** | **0.036 ± 0.004** | **0.141 ± 0.041** | **0.039 ± 0.028** | **0.051 ± 0.030** |

**Data shown are the average ± S.D.**
